# Supplementary material for: RalA, a GTPase targeted by miR-181a, promotes transformation and progression by activating the Ras-related signaling pathway in chronic myelogenous leukemia
Source: PubMed Central journal article supplement (PMC4991475; doi:10.18632/oncotarget.7987), 2016-03-08
Supplement: oncotarget-07-20561-s001.pdf [file oncotarget-07-20561-s001.pdf]

## RaIA, a GTPase targeted by miR-181a, promotes transformation and progression by activating the Ras-related signaling pathway in chronic myelogenous leukemia

### Supplementary Materials

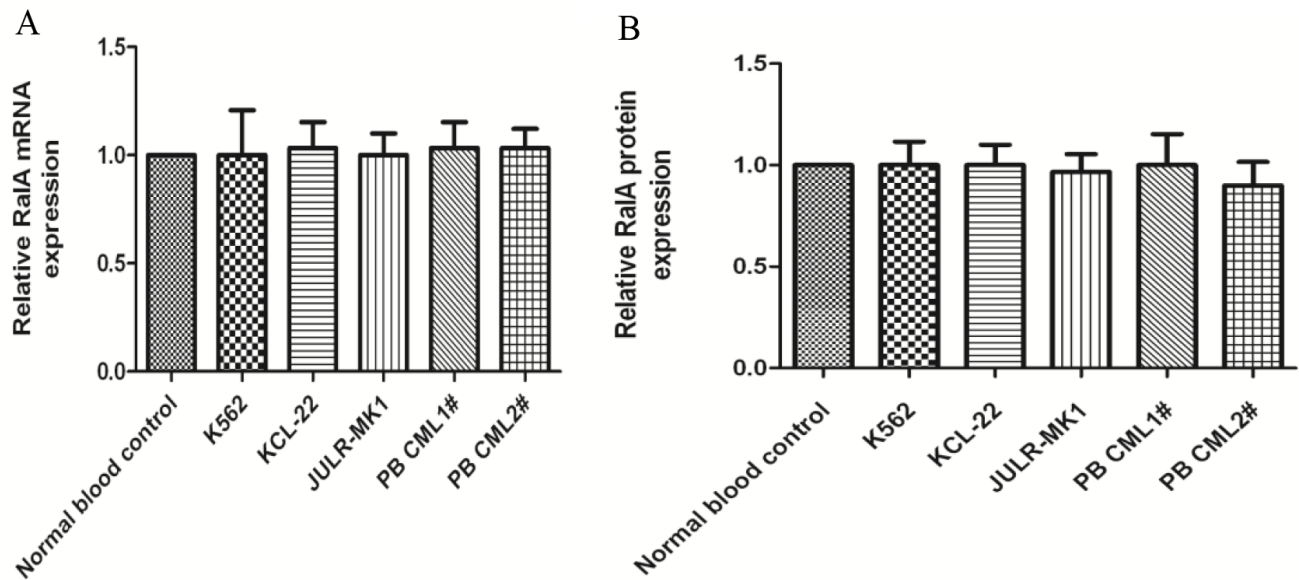

**Supplementary Figure S1: Relative RaIA expression in CML cells.** (A) Real-time PCR assay of relative expression level of RaIA mRNA in CML cells and samples. no groups exhibited significant changes ( $P > 0.05$ ). (B) Western blot analysis of RaIA protein of CML cells and samples. no groups exhibited significant changes ( $P > 0.05$ ).

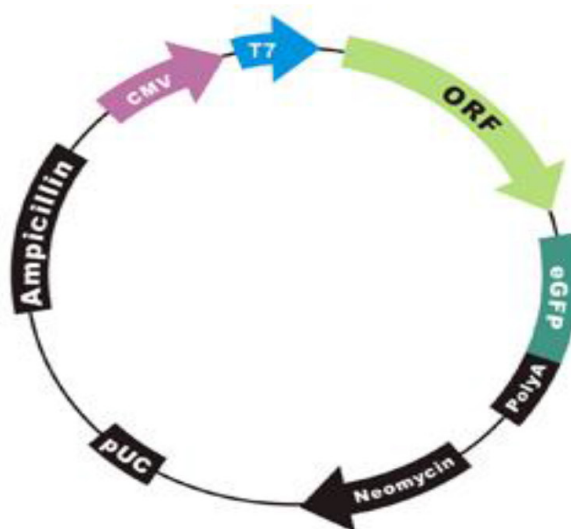

#### Vector Features

|                                |            |
|--------------------------------|------------|
| Promoter                       | CMV        |
| Host Cell                      | Mammalian  |
| Bacterial selection antibiotic | Ampicillin |
| Mammalian selection marker     | Yes        |
| Tag                            | C-eGFP     |

**Supplementary Figure S2: Vector information for EX-B0058-M03.** RaIA was inserted into pEZ-M03 vector to form EX-B0058-M03.

```

1  cggtagcgt  gtacggtggg  aggtctatat  aagcagagct  ctctggctaa  ctagagaacc
61  cactgcttac  tggcttatcg  aaattaatac  gactcactat  agggagaccc  aagctggcta
121  gttaagcttg  atcaacaag  tttgtacaaa  aaagcagget  tggaggagt  tcgaaccatg
181  gtcgactacc  tagcaataa  gcccaagggt  cagaattctt  tggettaca  caaagtcac
241  atggtgggca  gtggtggcgt  gggcaagca  gctctgactc  tacagttcat  gtacgatgag
301  tttgtggagg  actatgagcc  taccaaagca  gacagctatc  ggaagaaggt  agtgctagat
361  ggggaggaag  tccagatcga  tatcttagat  acagctgggc  aggaggacta  cgctgcaatt
421  agagacaact  acttccgaag  tggggagggg  ttcctctgtg  tttctctat  tacagaaatg
481  gaatccttg  cagctacagc  tgacttcagg  gagcagattt  taagagtaa  agaagatgag
541  aatgttccat  ttctactggt  tggtaacaaa  tcagatttag  aagataaaag  acaggtttct
601  gtagaagagg  caaaaaacag  agctgagcag  tggaatgta  actacgtgga  aacatctgct
661  aaaacacgag  ctaatgttga  caaggtattt  tttgatttaa  tgagagaaat  tcgagcgaga
721  aagatggaag  acagcaaaga  aaagaatgga  aaaaagaaga  ggaaaagttt  agccaagaga
781  atcagagaaa  gatgctgcat  ttatacctc  gagtgcggcc  gcaaccagc  tttcttgtag
841  aaagtggttc  gatctagaat  ggctagcgtg  agcaaggcg  aggagctgtt  caccggggtg
901  gtgccatcc  tgtcgagctg  gacggcgacg  taaacggcca  caagttcagc  gtgtccggcg
961  agggcgagg  cgatgcc

```

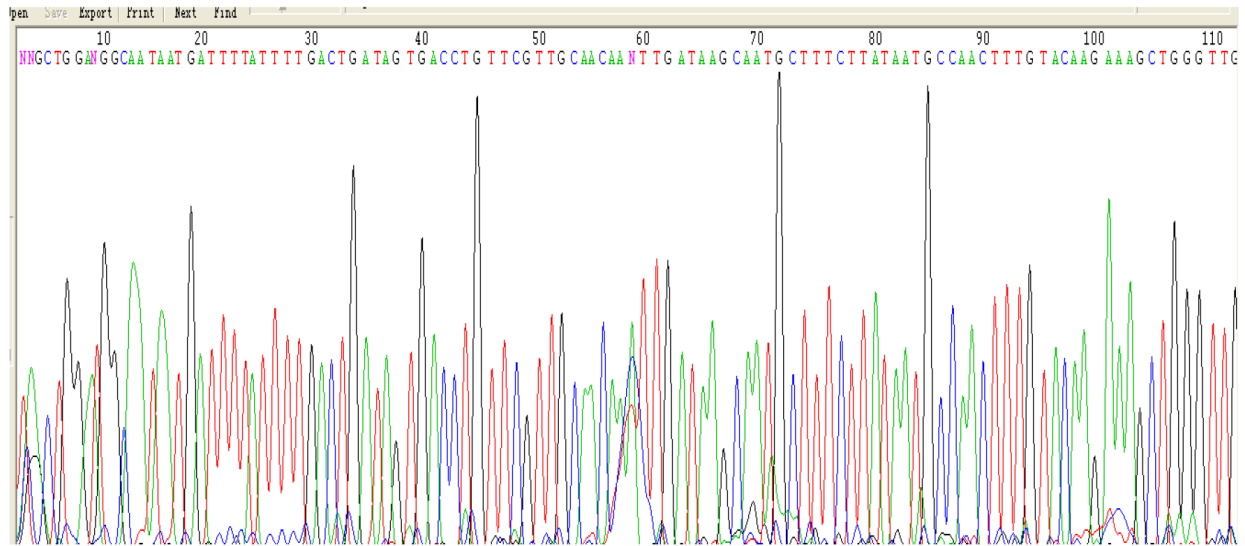

Supplementary Figure S3: The sequencing diagram of RalA plasmid (part).

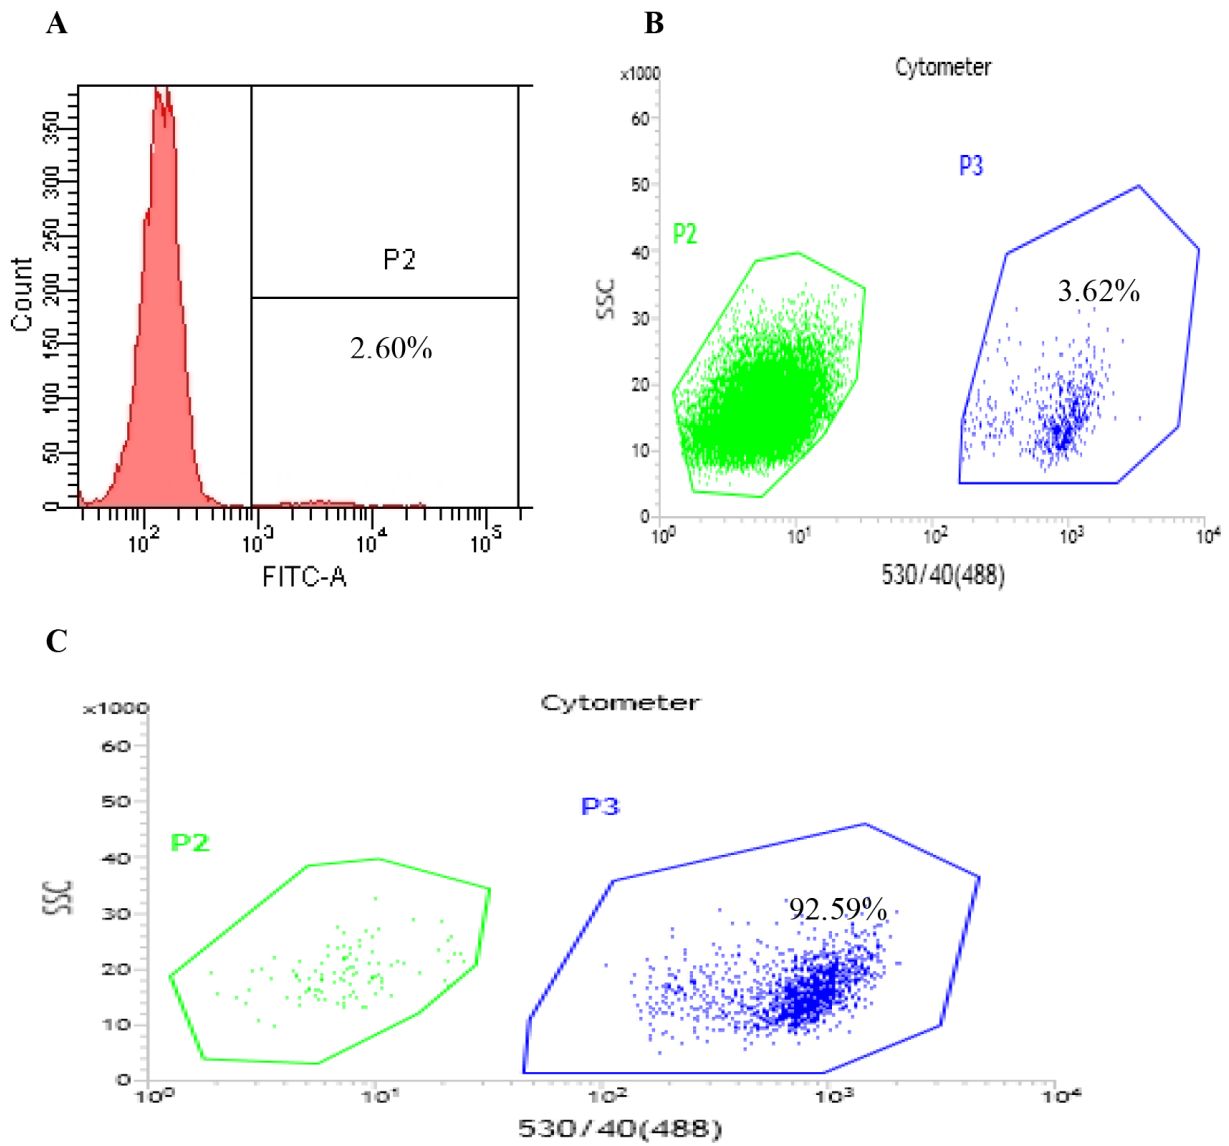

**Supplementary Figure S4: FACS (BD Influx) sorting GFP positive K562 cells after transfection with RalA plasmid.** (A) GFP rate of K562 cells transfected with RalA plasmid before sorted with FACS. K562 cells washed with cold PBS and GFP rate was detected with FACS, the rate was 2.60%. (B) GFP rate of K562 cells transfected with RalA plasmid when sorted with FACS. K562 cells were washed with cold PBS and GFP rate was detected when sorting with with FACS, the GFP rate was 3.62%. (C) GFP rate of K562 cells transfected with RalA plasmid after sorted with FACS. K562 cells were washed with cold PBS and GFP rate was detected after sorted with FACS, the GFP rate was 92.59%.

**Supplementary Table S1: Phosphorylation signal pathway by integration of eight commonly downregulated phosphorylation signal molecules**

| KEGG PATHWAY                          | ID       | Input Genes                  | P-Value          |
|---------------------------------------|----------|------------------------------|------------------|
| ErbB signaling pathway                | hsa04012 | SAPK/JNK Src P38 MAPK        | 0.00655529177188 |
| GnRH signaling pathway                | hsa04912 | SAPK/JNK Src P38 MAPK        | 0.00760324811502 |
| NOD-like receptor signaling pathway   | hsa04621 | SAPK/JNK P38 MAPK            | 0.0125608386305  |
| TNF signaling pathway                 | hsa04668 | SAPK/JNK P38 MAPK JunB       | 0.0136693571715  |
| Colorectal cancer                     | hsa05210 | SAPK/JNK P38 MAPK            | 0.0155731338224  |
| VEGF signaling pathway                | hsa04370 | Src VEGFR2 P38 MAPK          | 0.0162200972063  |
| Pancreatic cancer                     | hsa05212 | SAPK/JNK P38 MAPK            | 0.0182506095252  |
| Fc epsilon RI signaling pathway       | hsa04664 | SAPK/JNK P38 MAPK            | 0.0211678802873  |
| Osteoclast differentiation            | hsa04380 | SAPK/JNK P38 MAPK JunB       | 0.0261746365106  |
| Focal adhesion                        | hsa04510 | SAPK/JNK P38 MAPK Src VEGFR2 | 0.0287905207274  |
| Toll-like receptor signaling pathway  | hsa04620 | SAPK/JNK P38 MAPK            | 0.0606718992031  |
| Neurotrophin signaling pathway        | hsa04722 | SAPK/JNK P38 MAPK            | 0.0773124843557  |
| Acute myeloid leukemia                | hsa05221 | P38 MAPK c-Kit               | 0.0819213197905  |
| Adipocytokine signaling pathway       | hsa04920 | SAPK/JNK                     | 0.11715504168    |
| Insulin signaling pathway             | hsa04910 | SAPK/JNK P38 MAPK            | 0.112289072507   |
| RIG-I-like receptor signaling pathway | hsa04622 | SAPK/JNK                     | 0.11715504168    |
| Thyroid cancer                        | hsa05216 | P38 MAPK                     | 0.215520758417   |
| T cell receptor signaling pathway     | hsa04660 | SAPK/JNK P38 MAPK            | 0.216151824228   |
| Wnt signaling pathway                 | hsa04310 | SAPK/JNK                     | 0.320210291548   |
| MAPK signaling pathway                | hsa04010 | SAPK/JNK P38 MAPK            | 0.355531741604   |
| mTOR signaling pathway                | hsa04150 | P38 MAPK                     | 0.389762952625   |
| Pathways in cancer                    | hsa05200 | SAPK/JNK P38 MAPK            | 0.277474423054   |
| Glioma                                | hsa05214 | P38 MAPK                     | 0.41400998985    |
| Chronic myeloid leukemia              | hsa05220 | P38 MAPK                     | 0.450827803876   |
| B cell receptor signaling pathway     | hsa04662 | P38 MAPK                     | 0.455265208431   |
| TGF-beta signaling pathway            | hsa04350 | P38 MAPK                     | 0.481150746969   |
| Hematopoietic cell lineage            | hsa04640 | c-Kit                        | 0.513771561689   |
| PI3K-Akt signaling pathway            | hsa04151 | VEGFR2 P38 MAPK c-Kit        | 0.537295853734   |
| MicroRNAs in cancer                   | hsa05206 | P38 MAPK                     | 0.910873982664   |
